# Supplementary material for: Proteome-Wide Analysis of Lysine 2-Hydroxyisobutyrylated Proteins in Fusarium oxysporum
Source: Front Microbiol. 2021 Feb 10;12:623735. doi: 10.3389/fmicb.2021.623735 (PMC7902869; doi:10.3389/fmicb.2021.623735)
Supplement: Supplementary Table 4 — Conservation of lysine 2-hydroxyisobutyrylated proteins in Fusarium oxysporum. [file Table_4.XLSX]

## Sheet: Table S4
Table S4. Conservation of lysine 2-hydroxyisobutyrylated proteins.
Protein accession	Protein accession of Homo_sapiens	Protein accession of Oryza_sativa	Protein accession of Physcomitrella_patens	Protein accession of Saccharomyces_cerevisiae	Protein accession of Toxoplasma_gondii
A0A0C4DHN8				P31412
A0A0C4DHP6			A9S4A1
A0A0C4DHP8		Q651E8	A9RG78		TGME49_207680-t26_1-p1
A0A0C4DHQ2	P07437	Q0DA75	A9RQS1	P02557	TGME49_266960-t26_1-p1
A0A0C4DHQ7	P68104	Q10QZ6	A9SJB4	P02994	TGME49_294800-t26_1-p1
A0A0C4DHS0	E7EMB3	Q6F332	A9SHH7	P06787	TGME49_249240-t26_1-p1
A0A0C4DHS7	P63244	Q6L4F8	A9TLL0	P38011	TGME49_216880-t26_1-p1
A0A0C4DHT3	P68371	Q0DA75	A9RQS1	P02557	TGME49_266960-t26_1-p1
A0A0C4DHU2	P00390	Q8S5T1	A9RJN3	P41921	TGME49_246920-t26_1-p1
A0A0C4DHU6	P01111	Q7XHP7	A9TW31	P01120	TGME49_258130-t26_1-p1
A0A0C4DHV0	P63096
A0A0C4DHV9	P30876		A9SJE5	P08518	TGME49_258210-t26_1-p1
A0A0C4DHW0				Q04013
A0A0C4DHW5				P07246
A0A0C4DHW6	P99999	Q0DI31		P00045	TGME49_219750-t26_1-p1
A0A0C4DHX4				P39676
A0A0C4DHX5	P61586	Q84TA8	Q9M5B8	P06780	TGME49_214770-t26_1-p1
A0A0C4DHX6	P68431	Q2RAD9	A9RDR6	P61830	TGME49_261240-t26_1-p1
A0A0C4DI50				P15703
A0A0D2X829	P06733	Q42971	A9SGH3	P00924	TGME49_268850-t26_1-p1
A0A0D2X844	Q99471		A9TK90
A0A0D2X849	O95340	Q6ZL22	A9TVJ8
A0A0D2X858	P50570	Q5JJJ5	A9SRT4	P21576	TGME49_321620-t26_1-p1
A0A0D2X864	O15371	Q688X1	A9S6P9		TGME49_317720-t26_1-p1
A0A0D2X877	Q8WWY3	Q0DRW2	A9T271		TGME49_244100-t26_1-p1
A0A0D2X898	P18077	Q6K8U8	A9SPY5	P41056	TGME49_249250-t26_1-p1
A0A0D2X8B6	P62857	Q0IXR7	A9RXD9	P0C0X0	TGME49_209290-t26_1-p1
A0A0D2X8C8	P26639	Q6Z0N5	A9U0D5	P04801	TGME49_300260-t26_1-p1
A0A0D2X8D1	P30101	Q53LQ0	A9SIY9	P17967	TGME49_211680-t26_1-p1
A0A0D2X8D3		Q10N21	Q8GU36	P00431
A0A0D2X8D7	P62258	Q6ZKC0	A9SDA7	P29311	TGME49_263090-t26_1-p1
A0A0D2X8F3	B1AK88			P13517
A0A0D2X8G3	P27708	B9EXM2	A9S2A9	P07259	TGME49_215260-t26_1-p1
A0A0D2X8G9	O75643		A9RTW1	P53327	TGME49_223390-t26_1-p1
A0A0D2X8H7	Q15738
A0A0D2X8I1	Q06210			P14742	TGME49_231350-t26_1-p1
A0A0D2X8I2	P62333	Q9FXT8	A9S4A7	P53549	TGME49_228210-t26_1-p1
A0A0D2X8J1	O75116	Q5SNF8	A9RQ93
A0A0D2X8K5		Q9LWJ2	A9T1Q4	P31373
A0A0D2X8K7	Q9H7B2
A0A0D2X8M2	P20618		A9TB10		TGME49_290005-t26_1-p1
A0A0D2X8N0		Q84ZC0		P41807
A0A0D2X8P0				P07275
A0A0D2X8P5	O95478
A0A0D2X8P6	Q86X55		A9RXU3		TGME49_219520-t26_1-p1
A0A0D2X8Q2	Q15397			Q04373
A0A0D2X8Q7	A2A3N6	O82143	Q9LM05	P38886	TGME49_223960-t26_1-p1
A0A0D2X8R2	S4R3E9	P51431	Q33BN2		TGME49_289750-t26_1-p1
A0A0D2X8S7	K7ER00	Q0IXT4	A9TXE7	P15625	TGME49_234505-t26_1-p1
A0A0D2X8T7	J3KQE5	Q7GD79	A9RHN7	P32835	TGME49_248340-t26_1-p1
A0A0D2X8U8	P62913	Q0E2I8	A9RD43	P0C0W9	TGME49_309820-t26_1-p1
A0A0D2X8W9	P26885	Q7XUX5	A9T259	P38911
A0A0D2X8X7	P12004		A9TGV8		TGME49_247460-t26_1-p1
A0A0D2X911	P42766	Q6K667	A9SPV0	P0CX84	TGME49_250810-t26_1-p1
A0A0D2X914	P11182	Q655Q2	A9SWS2		TGME49_319920-t26_1-p1
A0A0D2X917	Q02878	Q7XR19	A9SVY4	P05739	TGME49_313390-t26_1-p1
A0A0D2X925	E9PRY8	Q40680	A9T0G3	P32471	TGME49_226410-t26_1-p1
A0A0D2X934		Q2R3E2
A0A0D2X961		Q6ZKK4	A9TYH2	P38009
A0A0D2X963	D6RFN0	Q10QG2	A9TH34
A0A0D2X9D3	P08574	Q0DJC3	A9RCI4	P07143	TGME49_246540-t26_1-p1
A0A0D2X9D5	P35998	Q7GCH3	A9S5I6	Q01939	TGME49_277500-t26_1-p1
A0A0D2X9D6	P50991	Q6YUK5	A9T431	P39076	TGME49_272910-t26_1-p1
A0A0D2X9I6		Q6Z844	A9RJR7
A0A0D2X9I7	P33991			P30665	TGME49_219700-t26_1-p1
A0A0D2X9J5	Q15181	Q6ZGJ8	A9SSG3	P00817	TGME49_283830-t26_1-p1
A0A0D2X9K0	P27797	Q7XV86	A9RSC6		TGME49_310320-t26_1-p1
A0A0D2X9K1		Q6Z4E4	A9RTB7	P46367	TGME49_222160-t26_1-p1
A0A0D2X9L1	P23284	Q75M32	A9SSY0	P25719	TGME49_320640-t26_1-p1
A0A0D2X9L2				P14843
A0A0D2X9L7	Q15418	Q5SNF8	Q6BCT8	P12688	TGME49_226030-t26_1-p1
A0A0D2X9N1		Q0E0Z4	A9RMX0
A0A0D2X9Q6	P46977	Q7XQ88	A9U0P2	P39007
A0A0D2X9R6					TGME49_215090-t26_1-p1
A0A0D2X9R9				Q02046
A0A0D2X9U0	P07437	Q53M52	A9TW09	P02557	TGME49_316400-t26_1-p1
A0A0D2X9U6	K7ELC2	Q851P5	A9S4A4	Q01855	TGME49_213350-t26_1-p1
A0A0D2X9W6		Q0DLY4	A9RFL2
A0A0D2X9W8				P05626
A0A0D2X9X4	Q99436	Q9LST8	A9TB62	P25043	TGME49_306930-t26_1-p1
A0A0D2X9X7	O15160		A9T5P0		TGME49_267390-t26_1-p1
A0A0D2X9Z1	P30044	Q9FR35	A9S298	P38013
A0A0D2X9Z4					TGME49_209140-t26_1-p1
A0A0D2X9Z8		Q6K7D6		P38999
A0A0D2XA10	Q15418	Q53P85	A9S5F3	P06245	TGME49_206590-t26_1-p1
A0A0D2XA20	P40938			P38251	TGME49_273950-t26_1-p1
A0A0D2XA30				P38791
A0A0D2XA35		Q0J8Q8	A9SZK9
A0A0D2XA47	O00231	Q7X5X9	A9RB85		TGME49_227960-t26_1-p1
A0A0D2XA48	Q9HAV7	Q6Z0G0	A9TAI5	P38523	TGME49_265220-t26_1-p1
A0A0D2XA49	P61586		Q9M5B8	P06780	TGME49_214770-t26_1-p1
A0A0D2XA53	P48047		A9T5A4	P09457
A0A0D2XA54				Q04336
A0A0D2XA66		Q65XE0	A9SG31	P38197
A0A0D2XA74				Q07505
A0A0D2XA75				Q99287
A0A0D2XA80	P11142	Q6L509	A9TWR9	P22202	TGME49_273760-t26_1-p1
A0A0D2XA85	P30876		A9SJE5	P08518	TGME49_258210-t26_1-p1
A0A0D2XA87	P61313	Q6ATD9	A9SXV4	P05748	TGME49_228470-t26_1-p1
A0A0D2XAA8	P12268	Q9AY75	A9TN21	P50095	TGME49_233110-t26_1-p1
A0A0D2XAB2		Q5NAY4	A9THQ4	P00815
A0A0D2XAB6			A9RGV9	P29509
A0A0D2XAB7		Q6ZJ97	A9RJS7
A0A0D2XAB9		Q6ZJW9
A0A0D2XAC0	Q15046	Q6F2U9	A9SZV3	P15180	TGME49_205710-t26_1-p1
A0A0D2XAC2	Q9Y2R4
A0A0D2XAD3	O43447	Q6ZH98	A9TK88	P14832	TGME49_205700-t26_1-p1
A0A0D2XAF6				P53252
A0A0D2XAH7	P11142	Q6L509	A9TWR9	P40150	TGME49_273760-t26_1-p1
A0A0D2XAL2	P30837	Q9FRX7	A9U465	P46367	TGME49_222160-t26_1-p1
A0A0D2XAN2	P62241	Q0JDZ7	A9S3Y5	P0CX39	TGME49_245460-t26_1-p1
A0A0D2XAN4	Q7Z6Z7	Q0INM5	A9SYT0	Q03280	TGME49_295710-t26_1-p1
A0A0D2XAN5	P62753	Q75LR5	A9TKT5	P0CX37	TGME49_210690-t26_1-p1
A0A0D2XAN8		Q93W07	A9SP56	P16140	TGME49_219800-t26_1-p1
A0A0D2XAN9		Q5NBI8
A0A0D2XAP0	P07437	Q53M52	Q8H932	P02557	TGME49_316400-t26_1-p1
A0A0D2XAP5				P07257
A0A0D2XAT1	P68400		A9THD0		TGME49_263070-t26_1-p1
A0A0D2XAT5	P62280	Q7XIK5	A9S6F7	P0CX47	TGME49_226970-t26_1-p1
A0A0D2XAY6	P07741		Q45RT2
A0A0D2XAZ8	Q9H0A0			P53914	TGME49_218610-t26_1-p1
A0A0D2XB23		Q6H660		P15705	TGME49_252220-t26_1-p1
A0A0D2XB32			A9TF96
A0A0D2XB44	P62937	Q75M32	A9TU93	P14832	TGME49_230520-t26_1-p1
A0A0D2XB67	P63220	Q7Y199		Q3E754	TGME49_259240-t26_1-p1
A0A0D2XB71	P62829	Q9AV77		P0CX41	TGME49_312090-t26_1-p1
A0A0D2XB93		Q9AUQ1		P00927
A0A0D2XB97	Q9Y3T9			P39744
A0A0D2XBA4		P48600	A9S0E0	P07260
A0A0D2XBL2				P09232
A0A0D2XBL6	P39656	Q6ZLK0	A9SFI1
A0A0D2XBN2	O75390	Q7F8R1	A9RZ27	P00890	TGME49_268890-t26_1-p1
A0A0D2XBQ9	Q14914	Q7XUK3	A9TN09
A0A0D2XBZ0	P61247	Q0INR5	A9S3W8	P33442	TGME49_232710-t26_1-p1
A0A0D2XBZ9		Q94LR8		P47119	TGME49_202300-t26_1-p1
A0A0D2XC02	O43175	Q6ZAA5	A9SKA3		TGME49_239820-t26_1-p1
A0A0D2XC11	P50570	Q5JJJ5	A9SRT4	P21576	TGME49_321620-t26_1-p1
A0A0D2XC33	P54577			P36421
A0A0D2XC39			A9SRY7
A0A0D2XC66					TGME49_213800-t26_1-p1
A0A0D2XC68	P82933		A9SWE1
A0A0D2XC69		Q0E2Q7	A9RWY6	P29547	TGME49_300140-t26_1-p1
A0A0D2XCA8	Q15269			P16649
A0A0D2XCA9	Q16181			P25342
A0A0D2XCC1	P31040	Q6ZDY8	A9TP02	Q00711	TGME49_215590-t26_1-p1
A0A0D2XCD3	P20674
A0A0D2XCE6	P63261	Q10AZ4	Q6TYS2	P60010	TGME49_209030-t26_1-p1
A0A0D2XCF0				P23644
A0A0D2XCF2	P06493	Q84UI5	A9S9Q8	P21965	TGME49_265330-t26_1-p1
A0A0D2XCH3					TGME49_319950-t26_1-p1
A0A0D2XCI0	O60832	Q8H5T5	A9TKH2		TGME49_214210-t26_1-p1
A0A0D2XCI5	Q9H089			P53145
A0A0D2XCJ2	P36578	Q6ZLB8	A9RN38	P10664	TGME49_309120-t26_1-p1
A0A0D2XCJ5	P49411	Q851Y8	A9T9Z0	P02992	TGME49_262380-t26_1-p1
A0A0D2XCJ6		Q7XZX4		P41057
A0A0D2XCJ7	Q15084	Q942L2	A9TC27	P17967	TGME49_249270-t26_1-p1
A0A0D2XCK5	P50570	Q5JJJ5	A9SRT4	P21576	TGME49_321620-t26_1-p1
A0A0D2XCN6		Q9SLX0	A9S2H4	Q02821	TGME49_252290-t26_1-p1
A0A0D2XCP6	Q9UJS0		A9U3R3
A0A0D2XCQ0		Q75HE6	A9U4S7
A0A0D2XCQ4	P30085	Q7XI40	A9SIN7		TGME49_257740-t26_1-p1
A0A0D2XCR5			A9SYE1	P07283	TGME49_239710-t26_1-p1
A0A0D2XCS4		Q2QWT4	A9SIZ5
A0A0D2XCS8	O75400
A0A0D2XCX6	Q9UNX4			Q12220	TGME49_232380-t26_1-p1
A0A0D2XCX7	O15144			P53731
A0A0D2XCY4	P26368		A9SHD2
A0A0D2XCY5	P62277	Q69UI1	A9RKW1	P05756	TGME49_270380-t26_1-p1
A0A0D2XD02		Q6Z9C3	A9RAZ6	P38858
A0A0D2XD13		Q336U0	A9SIW3		TGME49_224090-t26_1-p1
A0A0D2XD14	P62316	Q5WMV0	A9TQH6		TGME49_270830-t26_1-p1
A0A0D2XD23	Q9Y2L1			P24276
A0A0D2XD54	P78316
A0A0D2XD81	P22694	Q852Q0	A9TIU4	P06245	TGME49_203010-t26_1-p1
A0A0D2XD82	P41250	Q7XLG5	A9TSY1	P38088	TGME49_256990-t26_1-p1
A0A0D2XD83	Q9Y6E0	Q9FWD9	A9RVT3		TGME49_226030-t26_1-p1
A0A0D2XDB1	P62917	Q2QNF3	A9RZ45	P0CX45	TGME49_204020-t26_1-p1
A0A0D2XDB5	P62495	Q6ZIQ1	A9SL76	P12385	TGME49_304710-t26_1-p1
A0A0D2XDB8	P62906	Q6ZJ04	A9U1W9	P0CX43	TGME49_215470-t26_1-p1
A0A0D2XDC9	P14735	Q7XIH2	A9SVZ0	Q06010
A0A0D2XDD2		Q6ZHS7	A9SU66
A0A0D2XDD3	O43809		A9RY95
A0A0D2XDE8	P62269	Q8H590	A9SF68	P0CX55	TGME49_225080-t26_1-p1
A0A0D2XDF7	P28065		A9S0L2		TGME49_218920-t26_1-p1
A0A0D2XDF8				Q03640
A0A0D2XDG5	P12081			P07263	TGME49_280600-t26_1-p1
A0A0D2XDH2	P36542	Q7G3Y4	A9TZ85	P38077	TGME49_231910-t26_1-p1
A0A0D2XDK1	P37198				TGME49_273850-t26_1-p1
A0A0D2XDK3	P41091	Q2QWZ1	A9TD58	P32481	TGME49_235970-t26_1-p1
A0A0D2XDK5	P60842	P35683	A9TZ99	P10081	TGME49_250770-t26_1-p1
A0A0D2XDL8	P05388		A9RZU5	P05317	TGME49_218410-t26_1-p1
A0A0D2XDM0	P31689	Q6F3B0	A9T6M4	P25294	TGME49_311240-t26_1-p1
A0A0D2XDM3				P23337
A0A0D2XDM8	Q9Y4W6	Q0DHL4	A9RHM7	Q01939	TGME49_202630-t26_1-p1
A0A0D2XDN1	Q16836	Q8S1G9	A9RJ32		TGME49_232090-t26_1-p1
A0A0D2XDN9	O00571	Q75HJ0	A9T4J8	P20447	TGME49_226250-t26_1-p1
A0A0D2XDP0	P49721	Q9LST6	A9S5N6	P22141	TGME49_254900-t26_1-p1
A0A0D2XDP3				Q12133
A0A0D2XDQ3		Q10NQ9	A9S0E0	P07260
A0A0D2XDQ9	P14324	O04882	A9SPQ1	P08524	TGME49_224490-t26_1-p1
A0A0D2XDS7	P54727	Q40742	A9TQ97		TGME49_295340-t26_1-p1
A0A0D2XDT4	P50990	Q75HJ3	A9U1I5		TGME49_287500-t26_1-p1
A0A0D2XDT8	P61513		A9THG9	P0CX25	TGME49_300190-t26_1-p1
A0A0D2XDU3	O14981	Q5SML0		P32597	TGME49_273870-t26_1-p1
A0A0D2XDU4				P06101
A0A0D2XDU8				P17649
A0A0D2XDW8			A9STZ1
A0A0D2XDX2	Q9ULV4
A0A0D2XDX6	P51531	Q5SML0		P32597	TGME49_320300-t26_1-p1
A0A0D2XDY6	Q9Y6E0	Q5QN75	A9RVT3	P06245	TGME49_305860-t26_1-p1
A0A0D2XDZ0	P25398	Q6ZLP8	A9U0N3	P48589	TGME49_205340-t26_1-p1
A0A0D2XDZ1	P62244	Q84ZP1	A9SAY9	P0C0W1	TGME49_234450-t26_1-p1
A0A0D2XDZ5	P30084	Q6H7I3	A9TBR6
A0A0D2XDZ7	P35520	Q9XEA8	A9TXJ4	P32582
A0A0D2XE03	O14818	Q6YT00	A9U3F0	P23638	TGME49_258150-t26_1-p1
A0A0D2XE29	B4DLN1		A9TKW0	P53163
A0A0D2XE31		Q8GT01	A9T0D9	P32263	TGME49_236070-t26_1-p1
A0A0D2XE36	Q12907
A0A0D2XE44	Q9Y295	Q5W796	A9RSR8		TGME49_244310-t26_1-p1
A0A0D2XE49	Q14152	Q5ZEN1	A9RFG7	P38249	TGME49_201680-t26_1-p1
A0A0D2XE52	P62136	Q5VRS7	A9SNF4	P32598	TGME49_310700-t26_1-p1
A0A0D2XE87		C7J9I3	A9RXK5	P19881	TGME49_209870-t26_1-p1
A0A0D2XE98	Q9UKD2			P33201	TGME49_255320-t26_1-p1
A0A0D2XEA1	P60174	Q69K00	A9RZK9	P00942	TGME49_225930-t26_1-p1
A0A0D2XEC7		Q5JLP6	A9SAN7	P40363
A0A0D2XED0	Q99615	Q5JNB5	A9SIP0		TGME49_313310-t26_1-p1
A0A0D2XEF4		Q2QVB4	A9RRM1	P14904	TGME49_297970-t26_1-p1
A0A0D2XEG1			A9TQK5
A0A0D2XEI3				P06208
A0A0D2XEI6	Q15691		A9S5A4		TGME49_227650-t26_1-p1
A0A0D2XEN0	P62081	Q10MS5	A9S5I8	P26786	TGME49_239100-t26_1-p1
A0A0D2XEN9	P11498	Q8S6N5	A9RJQ8	Q00955	TGME49_221320-t26_1-p1
A0A0D2XEP8				Q05506
A0A0D2XET1	P35520	Q9XEA8	A9SEU2	P32582
A0A0D2XEU1			A9TJ01		TGME49_258930-t26_1-p1
A0A0D2XEU5				Q03558
A0A0D2XEW9	Q3SXM5	Q7XMI8	A9RWX6		TGME49_294820-t26_1-p1
A0A0D2XEY0					TGME49_233310-t26_1-p1
A0A0D2XG20	P18754
A0A0D2XG82				P32316
A0A0D2XG90				Q04178
A0A0D2XGH3	Q9BVJ6
A0A0D2XGN1	Q7KZF4		A9TJW2		TGME49_238050-t26_1-p1
A0A0D2XGN9	P62701	Q5ZBX1	A9TPQ8	P0CX35	TGME49_207440-t26_1-p1
A0A0D2XGP1	P07954		A9S5C6	P08417
A0A0D2XGR6	P11498		A9RNK1	P32327	TGME49_284190-t26_1-p1
A0A0D2XGS9		Q9FR35	A9RB37	P38013	TGME49_286630-t26_1-p1
A0A0D2XGT0	P83731	Q0D7Q0	A9SBP8	P24000
A0A0D2XGT8	P61927	Q6Z8Y5	A9TFX4	P49166	TGME49_239330-t26_1-p1
A0A0D2XGV1	O14602	Q7Y1V2	A9TTA1	P38912	TGME49_262720-t26_1-p1
A0A0D2XGW2	P11142	Q10NA9	A9SNF1	P38788	TGME49_273760-t26_1-p1
A0A0D2XGY4	J3KNF8	Q7XCR6	A9SE60
A0A0D2XGY9		Q0DBY0	A9SRC9
A0A0D2XH20	Q13310	Q6YYV1	A9SVZ7	P04147	TGME49_224850-t26_1-p1
A0A0D2XH43		Q8W425	A9S997		TGME49_238180-t26_1-p1
A0A0D2XH58	Q13126
A0A0D2XH63	P16435
A0A0D2XH74		Q94LQ9		P25655	TGME49_291140-t26_1-p1
A0A0D2XH78		Q9XJ54	A9SU69	P33331	TGME49_233350-t26_1-p1
A0A0D2XH79	P62424		A9RZJ0	P29453	TGME49_261570-t26_1-p1
A0A0D2XHA3				P13663
A0A0D2XHB5	Q9H845	Q75IM9	A9TJ89
A0A0D2XHD8	Q8NE71		A9SUB3	P53978	TGME49_318710-t26_1-p1
A0A0D2XHH6	E9PAV3	Q8RUI4	A9U4U1	P38879	TGME49_205558-t26_1-p1
A0A0D2XHH7	P50914			P36105
A0A0D2XHI2		B7E914
A0A0D2XHI3		Q7XIT4
A0A0D2XHK3		Q10NC7	A9T0Z3		TGME49_264760-t26_1-p1
A0A0D2XHL0	P36543	Q8SA35	A9SDL8	P22203	TGME49_305290-t26_1-p1
A0A0D2XHT6	P55786	Q6Z6L4	A9TQY2	P32454	TGME49_224350-t26_1-p1
A0A0D2XHT9				P32449
A0A0D2XHU2	P26373	Q7XJB4	A9RPU7	P40212	TGME49_263050-t26_1-p1
A0A0D2XI04		Q6Z382	A9TP01		TGME49_273370-t26_1-p1
A0A0D2XI35	O43776	Q93WM3	A9S8S1	P38707
A0A0D2XI55		Q0D5W6	A9RE84		TGME49_286090-t26_1-p1
A0A0D2XI68	P46778	Q10RZ3	A9TRK1	Q02753	TGME49_245680-t26_1-p1
A0A0D2XI69	P46781	Q2R1J8	A9RKT7	P05755	TGME49_248480-t26_1-p1
A0A0D2XI99	P54578	Q5JK78	A9S235	P43593
A0A0D2XIA9	Q9UK45	Q6ZBS1	A9T9R4		TGME49_286560-t26_1-p1
A0A0D2XIB5				P47190
A0A0D2XIF6	Q16795	Q6K6A4
A0A0D2XIF7	Q9UNM6	Q10Q05	A9SX33
A0A0D2XIG0	A2A274			P19414
A0A0D2XIG8	O15269
A0A0D2XIH4	P53621	Q0J3D9	A9SK16	P53622	TGME49_240650-t26_1-p1
A0A0D2XIH5	P48556	Q8W423	A9S4T6	P32496
A0A0D2XIL3	Q9BXW7
A0A0D2XIL4	C9JRZ8	Q60EL7	A9SZE7	Q12458
A0A0D2XIR9		Q688M9		P39721
A0A0D2XIX9		Q8H631	A9TDM5
A0A0D2XJG4	P46776	Q8GSE9	A9REA3	P02406	TGME49_310490-t26_1-p1
A0A0D2XJH3	O14561	Q8GVH7	A9S5D8	P32463
A0A0D2XJH5		Q7XZW1	A9SIS3
A0A0D2XJP4	P05455
A0A0D2XJP5		Q6F2U7	A9TNR4		TGME49_222970-t26_1-p1
A0A0D2XJQ5	P62987	Q9ARZ9	A9RJI9	P05759	TGME49_289750-t26_1-p1
A0A0D2XJR4	P34932	Q9AQZ5	A9SDD3	P32589	TGME49_219310-t26_1-p1
A0A0D2XJU1	P13804	Q75LJ3	A9TCZ3	Q12480
A0A0D2XJU2	F8VXC8
A0A0D2XJU4	Q01518				TGME49_310030-t26_1-p1
A0A0D2XJU6	P49736			P29496	TGME49_216730-t26_1-p1
A0A0D2XJV1	P30050	Q6Z8E0	A9RKD8	P0CX53	TGME49_254440-t26_1-p1
A0A0D2XJX1			A9U0M4
A0A0D2XJX9				P17891
A0A0D2XJZ4	P18621	Q6K1W6	A9S035	P05740	TGME49_299050-t26_1-p1
A0A0D2XK12	Q92973
A0A0D2XK73	O60749
A0A0D2XK76	P07900	Q69QQ6	A9TQU1	P15108	TGME49_288380-t26_1-p1
A0A0D2XK80	Q8NE71	Q84ZB2	A9T8D4	P40024	TGME49_318710-t26_1-p1
A0A0D2XK87	P62191	Q8W422	A9SRU1	P33298	TGME49_267080-t26_1-p1
A0A0D2XK89	P53597	Q6ZL94	A9SHI9		TGME49_290600-t26_1-p1
A0A0D2XKA6				P31384
A0A0D2XKC2		Q6YZH8	A9SVA5	P39522
A0A0D2XKC5	Q9H993			Q04371
A0A0D2XKE5		Q7XLQ4	A9SK99		TGME49_314860-t26_1-p1
A0A0D2XKG1				P25343
A0A0D2XKG6		P55142	A9S1V6	P17695
A0A0D2XKG8	M0QYS1	Q7F225	A9T6N0	P26784	TGME49_292130-t26_1-p1
A0A0D2XLL7		Q5QN02	A9SXY2	P21264
A0A0D2XLS0	Q14008
A0A0D2XLZ8		Q6ETS8	A9T5P4	P32377
A0A0D2XM54	O95292	Q6ZJR5	A9TNP2	P40075
A0A0D2XM73	Q08752	Q69TG8	A9T807	P53691	TGME49_230520-t26_1-p1
A0A0D2XM75				P06102	TGME49_233020-t26_1-p1
A0A0D2XMA8	P50579		A9RMQ9
A0A0D2XMB5	Q16539	Q84UI5	A9S9Q8		TGME49_233010-t26_1-p1
A0A0D2XMC3			A9SX77	P32495	TGME49_313560-t26_1-p1
A0A0D2XMC9	P41227
A0A0D2XMD3			A9THT9	P40553
A0A0D2XMD5				P00128
A0A0D2XME1	P49748
A0A0D2XMH0	E7EPT4	Q6L4W7	A9RYL7
A0A0D2XMI5	P27635	Q0ITS8	A9RCU9	P41805	TGME49_288720-t26_1-p1
A0A0D2XMI8		Q9SMB1	A9RFU9	Q12074
A0A0D2XMK8	F5H2F4	Q67UE5	A9TG75	P07245
A0A0D2XMK9	Q13347	Q6YS69	A9RXT4	P40217	TGME49_289830-t26_1-p1
A0A0D2XML0	O60264	Q5SML0		Q08773	TGME49_273870-t26_1-p1
A0A0D2XML3	P46934	Q0INM5	A9SYT0	P39940	TGME49_295710-t26_1-p1
A0A0D2XML4	Q96DH6	Q2R0P4	A9RFC1	P04147	TGME49_264610-t26_1-p1
A0A0D2XMM8	P11766	Q0DWH1	A9SZH7
A0A0D2XMP0	P09960	Q84TA3		Q10740
A0A0D2XMQ0	J3KQN4	Q0D5Z2	A9ST20	P0CX27	TGME49_203630-t26_1-p1
A0A0D2XMQ1		Q9MAX6	A9RK76
A0A0D2XMQ2	O60869			O14467
A0A0D2XMT6	Q6FI81	Q7XPW7
A0A0D2XMU1	P23381	Q2QP62	A9RQM2	Q12109	TGME49_288360-t26_1-p1
A0A0D2XMV7	P54886		A9RQV9	P54885	TGME49_270550-t26_1-p1
A0A0D2XMW0		Q65XK0	A9TQQ1	P06168
A0A0D2XMW1	P61081	Q6ZD28	A9TIG8	P15731	TGME49_304770-t26_1-p1
A0A0D2XMZ6	H0Y8C2	Q6YSX0	A9S086		TGME49_239760-t26_1-p1
A0A0D2XN02				P22146
A0A0D2XN10		Q6ZHC0			TGME49_315250-t26_1-p1
A0A0D2XN20		Q7XWP9	A9SUL8	P23254	TGME49_318310-t26_1-p1
A0A0D2XN28			A9T4W7		TGME49_211090-t26_1-p1
A0A0D2XN36	Q9Y5B9			P32558	TGME49_221670-t26_1-p1
A0A0D2XN44	O00566
A0A0D2XN99		Q656Y1	A9U233	P23291	TGME49_240640-t26_1-p1
A0A0D2XNA0	Q7Z7H5			Q05359
A0A0D2XNA9		Q75M19
A0A0D2XNG0	P08243	Q43011	A9U136	P49089	TGME49_253430-t26_1-p1
A0A0D2XNG1	P21796			P04840
A0A0D2XNG4	Q92900	Q0D6B1	A9TH44	P30771
A0A0D2XNK1				P43616
A0A0D2XNM2	P84098	Q84NX8	A9RDS2	P0CX82	TGME49_289530-t26_1-p1
A0A0D2XNM9	J3QQ67	Q5WMY3	A9S3J2	P0CX49	TGME49_300000-t26_1-p1
A0A0D2XNN3	P13797			P32599
A0A0D2XP20				P0CX33
A0A0D2XP79	Q9Y266	Q67X37	A9RZW7		TGME49_233680-t26_1-p1
A0A0D2XP83	P27144		A9RQJ3	P07170	TGME49_224900-t26_1-p1
A0A0D2XP87			A9ST27
A0A0D2XPF5	Q15084	Q67UF5	A9TQ07		TGME49_249270-t26_1-p1
A0A0D2XPP9	Q8IY81				TGME49_207990-t26_1-p1
A0A0D2XPQ6	Q9UJZ1	Q7EZD2	A9T1F8		TGME49_222210-t26_1-p1
A0A0D2XPR8		Q0J6A9	A9SKH8	P31116
A0A0D2XPS1	Q13247		A9RTX0	Q01560
A0A0D2XPT8		Q8H051	A9T298	P54839
A0A0D2XPV4	P49821	Q8H2T7	A9RJM8
A0A0D2XQ04		Q8LJ88	A9S2N1	Q08601	TGME49_206490-t26_1-p1
A0A0D2XQ30	Q5MNZ6
A0A0D2XQ58	P30419	Q8LR54			TGME49_209160-t26_1-p1
A0A0D2XQ76	O00232	Q851Y6	A9S9L3	Q12250	TGME49_261210-t26_1-p1
A0A0D2XQ92					TGME49_226400-t26_1-p1
A0A0D2XQA2				P27616
A0A0D2XQA6	Q14974	Q9ZWR4	A9TV49	Q06142
A0A0D2XQA8	Q01813			P16862
A0A0D2XQB6	P48643	Q5Z907	A9TJ27	P39077	TGME49_202370-t26_1-p1
A0A0D2XQC1	P11021	Q6Z7B0	A9T7Y9	P16474	TGME49_311720-t26_1-p1
A0A0D2XQD2	Q04760	Q0DJE6	A9SUG7	P50107	TGME49_248400-t26_1-p1
A0A0D2XQF4	P42765	Q94LR9	A9SD50	P41338	TGME49_301120-t26_1-p1
A0A0D2XQG2			A9T4J5	P47176
A0A0D2XQH9	Q8NE71	Q6K7R5	A9T8D4	P43535	TGME49_318710-t26_1-p1
A0A0D2XQI5	O95433
A0A0D2XQJ2	O75880	Q6H4G4			TGME49_257440-t26_1-p1
A0A0D2XQK4	P38117	Q7F9U3	A9RL78
A0A0D2XQK6		Q10N88	A9U5R8	P35197	TGME49_225310-t26_1-p1
A0A0D2XQM8	P13639	Q7XTK1	A9U245	P32324	TGME49_205470-t26_1-p1
A0A0D2XQN4	P50213	Q9SDG5	A9TBJ2	P28241
A0A0D2XQQ8				Q06338
A0A0D2XQS0	Q16539	Q84UI5	A9S9Q8	P21965	TGME49_233010-t26_1-p1
A0A0D2XQS4	Q13616			Q12018
A0A0D2XQU8	P51659	Q7XMI8	A9RWX6		TGME49_217740-t26_1-p1
A0A0D2XQV2	P27708	B9EXM2	A9S2A9	P07259	TGME49_215260-t26_1-p1
A0A0D2XQV4		Q6YV10	A9T6Y6
A0A0D2XQY3	Q16181			P25342
A0A0D2XQZ0				P19097
A0A0D2XQZ1				P07149
A0A0D2XR04	Q9GZR7	Q2R1M8	A9T4J8	P06634	TGME49_312990-t26_1-p1
A0A0D2XR18		Q10Q61	A9RGJ6	P41940
A0A0D2XR40	P25789	Q5VRG3	A9TLU6	P23638	TGME49_239500-t26_1-p1
A0A0D2XU68	P06744	Q0DD43	A9THT8	P12709	TGME49_283780-t26_1-p1
A0A0D2XU69	Q15418	Q5SNF8	Q6BCT8	P12688	TGME49_226030-t26_1-p1
A0A0D2XU70	P35606	Q5VQ78	A9TJC1	P41811	TGME49_235020-t26_1-p1
A0A0D2XU92	P38919	Q5VNM3	A9U4K0	P10081	TGME49_256770-t26_1-p1
A0A0D2XUD8	P63173	Q8GVY2
A0A0D2XUF1			A9SF86
A0A0D2XUF3	O75844	Q6EPN8	A9TQD0		TGME49_221170-t26_1-p1
A0A0D2XUG3	Q14738		A9SNL3
A0A0D2XUG8			A9RVT0	P53860
A0A0D2XUH4	Q86VP6				TGME49_215040-t26_1-p1
A0A0D2XUJ9				Q08446
A0A0D2XUL7				P41819
A0A0D2XUM4	Q32Q12	Q7XC37	A9T4T4	P36010	TGME49_295350-t26_1-p1
A0A0D2XUM5	Q14697	B9F676	A9SRV0	P38138
A0A0D2XUN7	P49368	Q5Z6U5	A9SZE5	P39077	TGME49_205440-t26_1-p1
A0A0D2XUP9	P61353	Q7XC31	A9TFR5	P0C2H6	TGME49_262690-t26_1-p1
A0A0D2XUQ7			A9TTP0
A0A0D2XUS0	M0R0R2	Q2R4A1	A9RHY5	P26783	TGME49_242330-t26_1-p1
A0A0D2XUS2	P05141	Q0DJC0	A9U2B4	P18239	TGME49_249900-t26_1-p1
A0A0D2XUT8	P53396	Q2QNG7	A9RFY5
A0A0D2XUT9	P53396	Q93VT8	A9RYG5		TGME49_290600-t26_1-p1
A0A0D2XUU9		Q6ZCH2	A9SHT9	Q00764	TGME49_297720-t26_1-p1
A0A0D2XUV0					TGME49_252510-t26_1-p1
A0A0D2XUX6	P60228	Q8GVI0			TGME49_273520-t26_1-p1
A0A0D2XUY6	Q13825	Q6H7I3	A9TAZ8		TGME49_202140-t26_1-p1
A0A0D2XUZ6		Q10N79	A9SLE5
A0A0D2XUZ7	E7ERK9			P12754
A0A0D2XV06	P62136	Q5VRS7	A9SNF4	P32598	TGME49_311310-t26_1-p1
A0A0D2XV20	G3V3A4	Q6K8D9	A9S8J4		TGME49_233190-t26_1-p1
A0A0D2XV33	O43175	Q9SXP2	A9SQZ2	P53839	TGME49_239820-t26_1-p1
A0A0D2XV60	Q8TED1	Q0JB49	A9SNN4	P40581	TGME49_266120-t26_1-p1
A0A0D2XV70	Q9UDY4	Q9FTT4	A9SIP0	P25294	TGME49_265310-t26_1-p1
A0A0D2XV91	Q9Y265	Q5SMU8	A9RE67		TGME49_219590-t26_1-p1
A0A0D2XV97	P11172	Q9LDN2	A9RSH8
A0A0D2XVA1	Q14498				TGME49_312530-t26_1-p1
A0A0D2XVE6	O75396	Q852J3	A9SFZ8		TGME49_270070-t26_1-p1
A0A0D2XVF0	P25786	Q9LSU1	A9SWP3	P40302	TGME49_278050-t26_1-p1
A0A0D2XVF1	Q9Y617	Q8LMR0	A9SH82	P33330
A0A0D2XVH5	P28331	Q8W317	A9RU37
A0A0D2XVI1	P46087		A9THC4		TGME49_288530-t26_1-p1
A0A0D2XVI3	Q9Y281	Q84TB3	A9TF31	Q03048
A0A0D2XVI4	P10809	Q8H903	A9TYY1	P19882	TGME49_247550-t26_1-p1
A0A0D2XVJ4	P04406	Q7FAH2	P34923	P00358	TGME49_289690-t26_1-p1
A0A0D2XVJ7	Q9Y230	Q5SMU8	A9TL22		TGME49_288860-t26_1-p1
A0A0D2XVK2	D6REX3		A9TPN4
A0A0D2XVK7	P46783	Q94DM7	A9TL01	P46784	TGME49_275810-t26_1-p1
A0A0D2XVL4	Q9H115	Q6YS11	A9TAV9		TGME49_218760-t26_1-p1
A0A0D2XVM8	P39023	Q0IPU6	A9TUZ9	P14126	TGME49_227360-t26_1-p1
A0A0D2XVM9				P14922
A0A0D2XVN0	P34897	Q10D68	A9RQ31	P37291	TGME49_234190-t26_1-p1
A0A0D2XVN9		A3C7K0	A9U3R3
A0A0D2XVP6	Q99832	Q653F6	A9RUB6	P39077	TGME49_297500-t26_1-p1
A0A0D2XVQ3	P40227	Q6ASR1	A9SYM5		TGME49_318410-t26_1-p1
A0A0D2XVT7	Q9H4A6			Q06385
A0A0D2XVU4	Q9BY44	Q6K8R0		P53235
A0A0D2XVX7		Q7XP22	A9U535	P40482
A0A0D2XVZ6		Q6YVE7
A0A0D2XW08	Q99880	Q6ZBP3	A9TL67	P02293	TGME49_305160-t26_1-p1
A0A0D2XW09	P0C0S8	Q84NJ4	A9S826	P04911	TGME49_261580-t26_1-p1
A0A0D2XW11	Q969S3
A0A0D2XW30	P42677		A9RMR9	P35997	TGME49_217570-t26_1-p1
A0A0D2XW50		Q5JMS3	A9S7P6	P36015	TGME49_215420-t26_1-p1
A0A0D2XW52				P07274
A0A0D2XW56	P63261	Q10DV7		P60010	TGME49_209030-t26_1-p1
A0A0D2XW86					TGME49_275480-t26_1-p1
A0A0D2XWB2	Q13200	Q6K2Q1	A9RDZ2	P38764	TGME49_313410-t26_1-p1
A0A0D2XWE3	P19388	Q2RAP1	A9RWG5		TGME49_240590-t26_1-p1
A0A0D2XWE8	Q08J23
A0A0D2XWF6	P30837	Q69XE0	A9RN60	P47771	TGME49_222160-t26_1-p1
A0A0D2XWF8		Q336P7
A0A0D2XWL4	P22314	Q2RBM4	A9SFQ4	P22515	TGME49_290290-t26_1-p1
A0A0D2XWL5	P22314	Q2RBM4	A9REZ6	P22515	TGME49_290290-t26_1-p1
A0A0D2XWN7		Q5Z5T2	A9SFK2		TGME49_290940-t26_1-p1
A0A0D2XWP3	P49748	Q75IM9	A9TJ89
A0A0D2XWQ1	P10599	Q6H7E4	A9SR27	P22217	TGME49_293870-t26_1-p1
A0A0D2XWQ9	P52565
A0A0D2XWT9	P0C7P4	Q6H4M9	A9RI84	P08067	TGME49_320220-t26_1-p1
A0A0D2XWU0	P17987	Q7FAT6	A9SN53	P39076	TGME49_229990-t26_1-p1
A0A0D2XWU1	P07814	Q2QS11	A9RFZ3	P38708	TGME49_219850-t26_1-p1
A0A0D2XWV3	P52888		A9RWY8	P25375
A0A0D2XWW0	Q13895				TGME49_238240-t26_1-p1
A0A0D2XWY5	P62820	Q6L502	A9SI73	P07560	TGME49_214770-t26_1-p1
A0A0D2XWY7		Q0DRP7	A9T2E1	P38910	TGME49_263530-t26_1-p1
A0A0D2XWZ0	Q13601				TGME49_262070-t26_1-p1
A0A0D2XX07	O00767			P21147	TGME49_238950-t26_1-p1
A0A0D2XX10	P36776	Q69UZ3	A9REQ0		TGME49_308580-t26_1-p1
A0A0D2XX16	Q99442
A0A0D2XX28	P31150	Q688K0	A9T562	P39958	TGME49_202380-t26_1-p1
A0A0D2XX29	Q9BZE4
A0A0D2XX30				P13298	TGME49_259660-t26_1-p1
A0A0D2XX35	P28066	Q9LSU1	Q93YB3	P23638	TGME49_249590-t26_1-p1
A0A0D2XX39	P38646	Q6Z7L1	A9T8E8	P0CS90	TGME49_251780-t26_1-p1
A0A0D2XX52			A9T794	P25332
A0A0D2XX58	O00571	Q75HJ0	A9T4J8	P06634	TGME49_312990-t26_1-p1
A0A0D2XX62	O95347				TGME49_231170-t26_1-p1
A0A0D2XX83	P24752	Q6K3Z3	A9T3P5	P41338	TGME49_301120-t26_1-p1
A0A0D2XXB4	O75821	Q6K4P1	A9SGZ9	Q04067	TGME49_294670-t26_1-p1
A0A0D2XXD6		Q69LA6	A9TWQ5		TGME49_237140-t26_1-p1
A0A0D2XXG3			A9SNV3	Q00055	TGME49_307570-t26_1-p1
A0A0D2XXI3	P61964	Q9AYI7		P38011	TGME49_215740-t26_1-p1
A0A0D2XXJ9				P16120
A0A0D2XXM8		Q10R17	A9SCV9	P80210	TGME49_279450-t26_1-p1
A0A0D2XXN9	P51553	Q9SDG5	A9TE71	P28834
A0A0D2XXW6		Q6ZGW6
A0A0D2XXX3	P78371	Q6AV23	A9TSP4	P39076	TGME49_243710-t26_1-p1
A0A0D2XYF7			A9RPR5
A0A0D2XYF9		Q6H713	A9SST6	P39726
A0A0D2XYV3	Q14562	Q5ZEC6		Q04217	TGME49_312280-t26_1-p1
A0A0D2XYW2	Q12904	Q0DBY0	A9SRC9	P46672
A0A0D2XYW6	Q14376	Q8LNZ3	A9T4W4		TGME49_225880-t26_1-p1
A0A0D2XYY9		Q5Z4E0
A0A0D2XZ15	Q14232
A0A0D2XZ23		Q7XEQ3	A9SGG5	P02407	TGME49_207840-t26_1-p1
A0A0D2XZ34	P28065	Q9LST9	A9RDB3		TGME49_223590-t26_1-p1
A0A0D2XZ38				P22138	TGME49_258210-t26_1-p1
A0A0D2XZ45	Q00610	Q2RBN7	A9T0L4	P22137	TGME49_290950-t26_1-p1
A0A0D2XZ51	P23526	Q0ISV7	A9RPK9	P39954	TGME49_225050-t26_1-p1
A0A0D2XZ52	B3KS98	Q7XMI6	A9THQ6
A0A0D2XZ56	P21912	Q9S827	A9TZU6		TGME49_215280-t26_1-p1
A0A0D2XZB9	P04181	Q10G56	A9SVW8	P07991
A0A0D2XZC5		Q7XUS2	A9TBG5	P00937
A0A0D2XZD6	P55072	Q10RP0	A9TRB0	P25694	TGME49_273090-t26_1-p1
A0A0D2XZH0	P60866	Q10P27	A9U106	P38701	TGME49_223050-t26_1-p1
A0A0D2XZH3	P62805	Q7XUC9	A9TW56	P02309	TGME49_239260-t26_1-p1
A0A0D2XZI9	Q9H078	Q6F2Y7	A9TRV8	P31539	TGME49_257990-t26_1-p1
A0A0D2XZL6	P08559	Q6Z5N4	A9TC13	P16387	TGME49_245670-t26_1-p1
A0A0D2XZM2	P60953	Q8H4Q9	Q9M5B8	P19073
A0A0D2XZM4				Q08925
A0A0D2XZN4	P23396	Q75G91	A9RVF7	P05750	TGME49_232300-t26_1-p1
A0A0D2XZN6	Q9NSD9	Q6AT40	A9RP53		TGME49_306960-t26_1-p1
A0A0D2XZP2	P55010	Q5Z4V2	A9U5A9	P38431	TGME49_244650-t26_1-p1
A0A0D2XZP5	Q04637	B9FXV5	A9SMV0	P39935
A0A0D2XZR0				P09938	TGME49_207060-t26_1-p1
A0A0D2XZR8				P32857
A0A0D2Y148	Q14914	Q7XUK3	A9TN09
A0A0D2Y1V7					TGME49_301390-t26_1-p1
A0A0D2Y1V9	P17980	Q5SNC0	A9TFB1	Q01939	TGME49_300310-t26_1-p1
A0A0D2Y1W8	P53618	Q0JNK5	A9TST3	P41810	TGME49_266990-t26_1-p1
A0A0D2Y1X8		Q5ZDJ3	A9SDC6	P12945	TGME49_223710-t26_1-p1
A0A0D2Y1Y1				P35844
A0A0D2Y1Y2				P14540
A0A0D2Y1Y9	J3KQ32	Q6Z1J6	A9TD27	P38219	TGME49_214350-t26_1-p1
A0A0D2Y1Z6	Q96QK1	Q84SZ6	A9TTF6		TGME49_242660-t26_1-p1
A0A0D2Y200	Q9NY93
A0A0D2Y241				P04037
A0A0D2Y249	Q9UMS4	Q9AV81	A9SC45		TGME49_320210-t26_1-p1
A0A0D2Y252	C9JRZ8	Q6Z718	A9T9P5	Q12458
A0A0D2Y253	Q9BRX2	Q7XR03
A0A0D2Y2C4	Q9HD20	Q6AUL4	A9RG70		TGME49_318460-t26_1-p1
A0A0D2Y2D7				Q06405
A0A0D2Y2E4		Q6ZEZ1
A0A0D2Y2E6		Q60EA3	A9S4I1
A0A0D2Y2F8	P39019		A9SNK0	P07280	TGME49_212290-t26_1-p1
A0A0D2Y2G2	O00487	Q9SDD1	A9T9Z3	P43588	TGME49_269840-t26_1-p1
A0A0D2Y2M4	A8MUS3	Q94CM9	A9S3T5	P04456	TGME49_238010-t26_1-p1
A0A0D2Y2N3		Q0JJZ7
A0A0D2Y2N6	P22102	Q6YZX5	A9T6Y5	P07244
A0A0D2Y2P2	Q9NW13		A9SSU3
A0A0D2Y2P7					TGME49_261460-t26_1-p1
A0A0D2Y2Q2	Q5W0H4	Q0IR97	A9RWX8	P35691	TGME49_251680-t26_1-p1
A0A0D2Y2S1	P62263	Q6H7T1	A9TTN2	P06367	TGME49_263700-t26_1-p1
A0A0D2Y2S2	P18124	Q6YYR2	A9RG91	P05737	TGME49_314810-t26_1-p1
A0A0D2Y2U9			A9S7D7
A0A0D2Y2W7	J3KTA4	Q6Z4K6	A9T4J8	P20447	TGME49_236650-t26_1-p1
A0A0D2Y2X9	Q96DI7	Q67WC9	A9TLL0		TGME49_310860-t26_1-p1
A0A0D2Y347					TGME49_293870-t26_1-p1
A0A0D2Y457		Q10NY1	A9RTV8		TGME49_201380-t26_1-p1
A0A0D2Y474	P0C0S5	Q84MP7	A9TYS8	P04911	TGME49_300200-t26_1-p1
A0A0D2Y496	P62195	Q7GCH3	A9TJJ6	Q01939	TGME49_261010-t26_1-p1
A0A0D2Y4A0	P55786	Q6Z6L4	A9TQY2	P37898
A0A0D2Y4A3	O15145			Q05933
A0A0D2Y4B0	Q9NVU7
A0A0D2Y4D0	P04181	Q688Q8	A9TZ98	P07991
A0A0D2Y4G8			A9T027
A0A0D2Y4H3				P47190
A0A0D2Y4I7	Q8IUZ0		A9T0S3	P36047	TGME49_267550-t26_1-p1
A0A0D2Y4J2	Q02543	Q943F3	A9SFY4	P0CX23	TGME49_262670-t26_1-p1
A0A0D2Y4K0		Q6Z3M0	A9TTU2	Q03161
A0A0D2Y4K1		Q0D4J5	A9RQX9
A0A0D2Y4L7	B7Z4C8	Q6ZGV5	A9RVD4	P0C2H8	TGME49_266070-t26_1-p1
A0A0D2Y4M4	P15880	Q84M35	A9U0C2	P25443	TGME49_305520-t26_1-p1
A0A0D2Y4N3	Q9Y4W6	Q8LQJ9	A9RHM7	P25694	TGME49_202630-t26_1-p1
A0A0D2Y4P0		Q6Z9R0	A9SIW4		TGME49_308040-t26_1-p1
A0A0D2Y4R0	O95363		A9T5K9
A0A0D2Y4R2		Q6YX88
A0A0D2Y4S9				P47075
A0A0D2Y4T6		Q7XPY2	A9TU44	P05030	TGME49_230420-t26_1-p1
A0A0D2Y4T8	O75390	Q7F8R1	A9RZ27	P00890	TGME49_268890-t26_1-p1
A0A0D2Y4U0		Q5QLE5	A9U0X8		TGME49_243800-t26_1-p1
A0A0D2Y4V3	P26885	A3C0C6	A9TGA1	P20081	TGME49_283850-t26_1-p1
A0A0D2Y4V8		Q6ZKI0	A9RW94	P25349
A0A0D2Y4W4		Q8LN72	A9SLA8	Q01662	TGME49_248850-t26_1-p1
A0A0D2Y4W9	P50213	Q9SDG5	A9SIP7	P40495
A0A0D2Y4X0	P13639	Q6H4L2	A9TWU2	P46943	TGME49_260170-t26_1-p1
A0A0D2Y4X5	Q9BVP2	Q5ZCV4			TGME49_305750-t26_1-p1
A0A0D2Y4Y1			A9TFD2		TGME49_213410-t26_1-p1
A0A0D2Y4Y5	Q9HCS7				TGME49_305240-t26_1-p1
A0A0D2Y4Z8			A9RV22
A0A0D2Y512		Q0INF6	A9RV90
A0A0D2Y544	O60701	Q9AUV6	A9TVD5
A0A0D2Y552	P15121	Q60EL7	A9SZE7	P14065
A0A0D2Y575	Q5T5C7	Q10QF5	A9TH40	P07284	TGME49_251690-t26_1-p1
A0A0D2Y596			A9SUB3	P53978	TGME49_318710-t26_1-p1
A0A0D2Y5A7	P10515	Q7XAL3	A9SH18	P12695	TGME49_219550-t26_1-p1
A0A0D2Y5D0	P49207	Q6ZD96	A9SGF2	P40525	TGME49_227600-t26_1-p1
A0A0D2Y5E5	F8W727	Q84QW3	A9SYS3	P38061	TGME49_267400-t26_1-p1
A0A0D2Y5E6	P62249	Q0IQF7	A9TGH1	P0CX51	TGME49_263040-t26_1-p1
A0A0D2Y5F2		Q6YZ09	A9SCF4	P40215	TGME49_209150-t26_1-p1
A0A0D2Y5G5				P33327	TGME49_249390-t26_1-p1
A0A0D2Y5H0	O75688	Q7XR06	A9RMR0		TGME49_232340-t26_1-p1
A0A0D2Y5H4	C9JGV6	Q0DIY4	A9T364		TGME49_293340-t26_1-p1
A0A0D2Y5J0				Q12118
A0A0D2Y5J5		Q7Y152	A9SKS5
A0A0D2Y5K0		Q6K2E8	A9RWH6	P07342
A0A0D2Y5L3		Q8RZU5	A9TEP4		TGME49_221490-t26_1-p1
A0A0D2Y5Q2		Q10BB4		P14020	TGME49_277970-t26_1-p1
A0A0D2Y5S0	Q9H0S4	Q6Z4K6	A9T4J8	P39517	TGME49_279330-t26_1-p1
A0A0D2Y5T7		B9FSC8	A9TUL6
A0A0D2Y5U1	Q8WWV3	Q7EYM8	A9U0T9	P53912
A0A0D2Y5W3	P00558	Q6H6C7	A9S8R3	P00560	TGME49_318230-t26_1-p1
A0A0D2Y644		Q8GT01	A9T0D9	P32263	TGME49_236070-t26_1-p1
A0A0D2Y8M2			A9RXU3		TGME49_219520-t26_1-p1
A0A0D2Y8M8	P41252	Q67WM2	A9TB11	P09436	TGME49_207640-t26_1-p1
A0A0D2Y8P1	P62266	Q8L4F2	A9SB19	P0CX29	TGME49_229670-t26_1-p1
A0A0D2Y8P5	P54819	Q0J6P7	A9RQJ3	P07170	TGME49_224900-t26_1-p1
A0A0D2Y8P8		Q7XPL2	A9RJD1		TGME49_223020-t26_1-p1
A0A0D2Y8R8	O43143	Q5ZEC6		Q04217	TGME49_233520-t26_1-p1
A0A0D2Y8U3				P24280
A0A0D2Y8U6		Q42456	A9SM45	P07267	TGME49_201840-t26_1-p1
A0A0D2Y8V4	P26196	Q7XMK8	A9SKD4	P39517	TGME49_313010-t26_1-p1
A0A0D2Y8W3		Q7XP22	A9TXD8
A0A0D2Y8W9	P61088	Q8W0I1	A9SDW9	P15731	TGME49_319870-t26_1-p1
A0A0D2Y8Z1		Q2QLY4	A9RT52	P05694
A0A0D2Y8Z4		Q0JHZ2	A9RK78		TGME49_236840-t26_1-p1
A0A0D2Y910	P61254	Q53PZ2	A9SUH7	P05743	TGME49_248390-t26_1-p1
A0A0D2Y915		Q657T0			TGME49_269650-t26_1-p1
A0A0D2Y939	P62820	Q6H8G2	A9SLS3	P01123	TGME49_214770-t26_1-p1
A0A0D2Y960	O14980	Q84M87	A9S636	P30822	TGME49_249530-t26_1-p1
A0A0D2Y970		Q10QU9	A9T6E0	P32905	TGME49_266060-t26_1-p1
A0A0D2Y973	Q9Y2X3	Q0DRW2	A9RQH7	Q12499	TGME49_205510-t26_1-p1
A0A0D2Y992				P38998
A0A0D2Y9B3	O00567	Q10LF8	A9RLI9	Q12460	TGME49_247470-t26_1-p1
A0A0D2Y9B4	P62979	Q9ARZ9	A9RJI9	P05759	TGME49_289750-t26_1-p1
A0A0D2Y9B5	P62854	Q0DHB9	A9TN72	P39938	TGME49_243570-t26_1-p1
A0A0D2Y9C0	P36957	Q7XVM2	A9T2C3	P19262	TGME49_219550-t26_1-p1
A0A0D2Y9E2	Q8NBU5	Q5Z9Q8	A9SGM2	P25694	TGME49_229950-t26_1-p1
A0A0D2YA36	P00505	P37833	A9SXD7	P23542	TGME49_248600-t26_1-p1
A0A0D2YBG4	P07814	Q8S5M6	A9S8X8	P46655	TGME49_263870-t26_1-p1
A0A0D2YBI2			A9T4J5	P47176
A0A0D2YBI5		Q0IWL9	A9S689	Q03835	TGME49_238070-t26_1-p1
A0A0D2YBJ3			A9SPM8
A0A0D2YBJ9		Q7F2G3	A9TMC2
A0A0D2YBQ3	P61204	Q9LDC9	A9TBY9	P40994	TGME49_276140-t26_1-p1
A0A0D2YBQ5				P29952	TGME49_260140-t26_1-p1
A0A0D2YBR1	P62847	Q5Z9S4	A9U2W7	P0CX31	TGME49_215460-t26_1-p1
A0A0D2YBW7	P00966	Q2QVC1	A9TX31
A0A0D2YBZ4	P25787	Q6H852	A9SAY6	P23639	TGME49_287210-t26_1-p1
A0A0D2YC00	O15213		A9S395
A0A0D2YC01					TGME49_265110-t26_1-p1
A0A0D2YC11	Q9BYG3				TGME49_215400-t26_1-p1
A0A0D2YC55	Q9NVP1	Q6Z4K6	A9T4J8	P20447	TGME49_312990-t26_1-p1
A0A0D2YC81	Q8TDN6
A0A0D2YC94				P00425
A0A0D2YC96		Q6H6P8	A9RL34	P32775	TGME49_209960-t26_1-p1
A0A0D2YC97	P06576	Q0JKB4	A9T278	P00830	TGME49_261950-t26_1-p1
A0A0D2YCA1	E9PCR7	Q0JDN5	A9RHR6	P20967	TGME49_244200-t26_1-p1
A0A0D2YCC0	O95602			P10964	TGME49_225260-t26_1-p1
A0A0D2YCC3		Q5VNW0	A9SYF9	P08566
A0A0D2YE67	J3KQ32	Q6Z1J6	A9TD27	P38219	TGME49_214350-t26_1-p1
A0A0D2YEB9	P15121	Q60EL7	A9SZE7	Q12458
A0A0D2YG56	P04040	Q0D9C4	A9TG35		TGME49_232250-t26_1-p1
A0A0D2YGI9	P30041	P0C5C9	A9RWK3		TGME49_309210-t26_1-p1
A0A0D2YGL3				Q08971
A0A0D2YGM3	Q99460	Q6Z921	A9SSP2	P32565	TGME49_263060-t26_1-p1
A0A0D2YH37	P11177	Q10G39	A9TY50	P32473	TGME49_272290-t26_1-p1
A0A0D2YH38		Q6ZIX2		P25087
A0A0D2YH39	Q9NW64				TGME49_254650-t26_1-p1
A0A0D2YH41				P32527	TGME49_203380-t26_1-p1
A0A0D2YH55	Q96ST2		A9SN56	Q06505
A0A0D2YHG0		Q6H7M1	A9SZX7
A0A0D2YJ18	Q9NVP1	Q6Z4K6	A9T4J8	P20447	TGME49_312990-t26_1-p1
A0A0J9U332			A9SST2		TGME49_289940-t26_1-p1
A0A0J9U3M5		Q0DBI0
A0A0J9U458	P11413	Q6K5H5	A9TA54	P11412	TGME49_278830-t26_1-p1
A0A0J9U4A1			A9SA45
A0A0J9U4E7	Q9UHD1
A0A0J9U4V0	P28070	Q9LST4		P30657	TGME49_280710-t26_1-p1
A0A0J9U4Z8	O43583	Q5SMX7	A9SEK1		TGME49_257060-t26_1-p1
A0A0J9U515	P52209	Q2R480	A9SWZ7	P38720	TGME49_307850-t26_1-p1
A0A0J9U569	Q99729				TGME49_224580-t26_1-p1
A0A0J9U592	P32969	Q6ZFJ5	A9S9E8	P05738	TGME49_284560-t26_1-p1
A0A0J9U5Y8				P47075	TGME49_298630-t26_1-p1
A0A0J9U6M1	P52789	Q8LQ68	A9T1J4	P04806	TGME49_265450-t26_1-p1
A0A0J9U6Z9	P31153	Q0DKY4	A9TJH4	P10659	TGME49_240690-t26_1-p1
A0A0J9U761				P11633	TGME49_210408-t26_1-p1
A0A0J9U7R5	P24928			P04050	TGME49_225260-t26_1-p1
A0A0J9U8F9	P00387	Q5VR12	A9RJM3	P36060
A0A0J9U972				P38988
A0A0J9U9B6				P39676
A0A0J9U9E1		Q6K8F1	A9S0U9		TGME49_214180-t26_1-p1
A0A0J9UA34		Q6H798	A9U083	P52910	TGME49_266640-t26_1-p1
A0A0J9UA85		Q75KH3	A9T6K3
A0A0J9UB50	P53041	Q5VRS7	A9SNF4	P32598	TGME49_312200-t26_1-p1
A0A0J9UBA6	P23284	Q75M32	A9SIJ8	P14832	TGME49_205700-t26_1-p1
A0A0J9UC03		Q5W6H1	A9TMB0		TGME49_279390-t26_1-p1
A0A0J9UC68	P55060		A9SW41	P33307
A0A0J9UCR8	P11498		A9RNK1	P32327	TGME49_284190-t26_1-p1
A0A0J9UD93	O96017	Q53P85	A9SZU6	P38623	TGME49_206590-t26_1-p1
A0A0J9UDK2				P10869
A0A0J9UE23	Q9BXB5			Q02201
A0A0J9UE38	P26640	Q851K9	A9SJ82	P07806	TGME49_253290-t26_1-p1
A0A0J9UEC0			A9RTT8	Q08220
A0A0J9UEH0				P22147	TGME49_305780-t26_1-p1
A0A0J9UEN2		Q6K840	A9SWH3		TGME49_294820-t26_1-p1
A0A0J9UEW7					TGME49_235880-t26_1-p1
A0A0J9UFA2	P38606	Q651T8	A9RHN4	P17255	TGME49_256970-t26_1-p1
A0A0J9UH25	Q9UNQ0	Q8H8V5		P33302
A0A0J9UH84	P49189	Q69XE0	A9U465	P46367	TGME49_222160-t26_1-p1
A0A0J9UHA8	O00330	Q654L9	A9SIX7	P12695
A0A0J9UI89	P14868	Q6ZHC3	A9TI29	P04802	TGME49_202530-t26_1-p1
A0A0J9UIT9	Q15046	Q6F2U9	A9SRN4	P15180	TGME49_205710-t26_1-p1
A0A0J9UJF4	O00148	Q5JK84	A9SV98	Q07478	TGME49_216860-t26_1-p1
A0A0J9UK72	O95340	Q6ZL22	A9TVJ8
A0A0J9UKV0	P30837	Q8H5F0	A9RQZ4	P38694	TGME49_222160-t26_1-p1
A0A0J9UKV6	P52789	Q1WM16	A9T1J4	P17709
A0A0J9UL15		Q656Y1	A9U233	P23291	TGME49_240640-t26_1-p1
A0A0J9UL32	P00441	Q0DRV6	A9SX65	P00445
A0A0J9UL57		Q6ZGW6
A0A0J9ULB1	O00410		A9TD30	P32337
A0A0J9ULB2	P20290	Q8LNW1	A9TXI8	Q02642
A0A0J9UMY7	P15170	Q0JEI2	A9S7L4	P05453	TGME49_320570-t26_1-p1
A0A0J9UMZ4	P22087	Q6K701	A9RL91	P15646	TGME49_311430-t26_1-p1
A0A0J9UNE9		Q8H859	A9SMM2	P07246
A0A0J9UNH8	Q14683		A9SLI2
A0A0J9UNI9		Q5WAB3	A9RSV4		TGME49_313670-t26_1-p1
A0A0J9UP21		Q2R3E2
A0A0J9UP31	I3L504	Q84ZK1	A9T3D3	P23301	TGME49_251810-t26_1-p1
A0A0J9UPQ3			A9T411	P38627	TGME49_299210-t26_1-p1
A0A0J9URW8	O60264	Q5SML0		Q08773	TGME49_273870-t26_1-p1
A0A0J9US49	O75688	Q653S3	A9TTK6		TGME49_232340-t26_1-p1
A0A0J9USN5	P46777	Q0JGY1	A9SNA3	P26321	TGME49_320050-t26_1-p1
A0A0J9USU1					TGME49_318490-t26_1-p1
A0A0J9UT99	P62888	Q6F331	A9S5P2	P14120	TGME49_232230-t26_1-p1
A0A0J9UTA6		Q9SMB1	A9RFU9	Q12074
A0A0J9UTD3		Q4W8D0	A9TWD3	P32288
A0A0J9UUP8	G3V5Z7	Q9LSU3	A9TFP4	P21243	TGME49_242290-t26_1-p1
A0A0J9UVD3	P24752	Q6K3Z3	A9T3P5	P41338	TGME49_301120-t26_1-p1
A0A0J9UVJ9	Q92616	Q6ASU8	A9RIY6	P33892	TGME49_231480-t26_1-p1
A0A0J9UW30	P20042	Q7XHW8	A9TPF7		TGME49_235540-t26_1-p1
A0A0J9UW39	O75083	Q9AWU6	F5CC80	P46680
A0A0J9UXI3	P06737	Q8LQ33	A9T7T8	P06738	TGME49_310670-t26_1-p1
A0A0J9UXY9	O15067	Q0JH25	A9TZH0	P38972
A0A0J9UYI6	P13639	Q7XTK1	A9U245	P32324	TGME49_205470-t26_1-p1
A0A0J9UYJ1			A9S6K8	P20051
A0A0J9V005	P05023		Q7XB51	P05030
A0A0J9V227	P50213	Q0DPW7	A9RIX2	P40495
A0A0J9V2G6		Q5KQH5	A9T0F6
A0A0J9V2G7				P15454	TGME49_242730-t26_1-p1
A0A0J9V2N3	Q9P2J5	Q6H4P7	A9RZT5	P26637	TGME49_292080-t26_1-p1
A0A0J9V3D2	Q13724
A0A0J9V3E8	Q9NY12				TGME49_272010-t26_1-p1
A0A0J9V3J9	P52272				TGME49_262620-t26_1-p1
A0A0J9V3Q2		Q2QNJ8	A9TE60		TGME49_257490-t26_1-p1
A0A0J9V466			A9SK66
A0A0J9V474		Q0DRT9	A9TPL0		TGME49_240870-t26_1-p1
A0A0J9V4I2	Q16539	Q84UI5	A9S9Q8	P39073	TGME49_233010-t26_1-p1
A0A0J9V5F4		Q10MW3		P06169
A0A0J9V5H9	P09622	Q9ASP4	A9SNH9	P09624	TGME49_206470-t26_1-p1
A0A0J9V6G0	Q16513	Q5SNF8	Q6BCT8	P24583	TGME49_226030-t26_1-p1
A0A0J9V6U4	E7EMB3	Q0JNS6	A9SHH7	P53141	TGME49_249240-t26_1-p1
A0A0J9V7A0	P35573			Q06625	TGME49_226910-t26_1-p1
A0A0J9V7Z2	P05198	Q10MT2	A9S8D1	P20459	TGME49_313230-t26_1-p1
A0A0J9V8E7	P33176		A9RFC8	P32364	TGME49_207665-t26_1-p1
A0A0J9V9B8		Q94LV4	A9SZC8	P47176
A0A0J9VAD6	B4DR61	Q6ES90	A9TUA0	P32915	TGME49_269980-t26_1-p1
A0A0J9VCM0		Q7X7N2	A9SF41
A0A0J9VF77	Q06830	Q6ER94	A9RVC0	P34760	TGME49_217890-t26_1-p1
A0A0J9VFU7	Q96A72		Q5EIU7		TGME49_267420-t26_1-p1
A0A0J9VG59	P61964		A9T1E6	P16649
A0A0J9VGG5	B5ME19	Q6Z720	A9RF12	P32497	TGME49_294620-t26_1-p1
A0A0J9VGI8	P20340	Q8H4Q9	A9S0B5	Q99260	TGME49_310460-t26_1-p1
A0A0J9VGL8	P40926	Q42972	A9SLS5	P17505	TGME49_318430-t26_1-p1
A0A0J9VH02	P47897	Q65WY6	A9S2J6	P13188	TGME49_217460-t26_1-p1
A0A0J9VH63	P40926	Q0J5H3	A9RZZ9	P17505
A0A0J9VII7	Q00325	O80414	A9SAS8	P23641	TGME49_278990-t26_1-p1
A0A0J9VL03	Q12965	Q6AVV2	A9SX53	Q04439	TGME49_255190-t26_1-p1
A0A0J9VLH9	Q9NQ55
A0A0J9VPT8	P51665	Q0J9C1	A9TB60	Q08723	TGME49_269250-t26_1-p1
A0A0J9VPV0	P00505	Q5Z7I8	A9TG09	P23542	TGME49_248600-t26_1-p1
A0A0J9VQP6				Q12159
A0A0J9VQQ4	Q14914	Q7XUK3	A9TN09
A0A0J9VRH1	Q9P2R7	Q6K9N6		P53312	TGME49_309752-t26_1-p1
A0A0J9VVP2	P04179	Q43008	A9T6N6	P00447	TGME49_316310-t26_1-p1
A0A0J9VWY5	P62491	Q852B4	A9TDJ8	P51996	TGME49_289680-t26_1-p1
A0A0J9W580	Q15477				TGME49_285660-t26_1-p1
A0A0J9WB42				Q05911
A0A0J9WFU3	Q9Y2L1				TGME49_261050-t26_1-p1
A0A0J9WFZ0	P25705	P0C522	Q1XGA4	P07251	TGME49_204400-t26_1-p1
A0A0J9WG57	P46060			P11745
A0A0J9WGD0	P36871	Q9AUQ4	A9TBM5	P37012	TGME49_285980-t26_1-p1
A0A0J9WGH7			Q4KSL4		TGME49_260600-t26_1-p1
A0A0J9WGI7	G3V0E4	Q10Q21	A9SI85	P07256	TGME49_236210-t26_1-p1
A0A0J9WGK7	P49588	Q10A14	A9T4K7	P40825	TGME49_219540-t26_1-p1
A0A0J9WGK8	P23193	Q75GR3
A0A0J9WGU0	O00487	Q9SDD1	A9S453	P43588	TGME49_269840-t26_1-p1
A0A0J9WH36	P55209	Q53WK4	A9TVZ4
A0A0J9WH96	Q16798	Q5JKW5	A9RCF4	P36013
A0A0J9WHK1	P55263	Q6K1R5	O49923	P47143	TGME49_250880-t26_1-p1
A0A0J9WHN0	P11387				TGME49_234360-t26_1-p1
A0A0J9WJB1		Q9LGF8			TGME49_226600-t26_1-p1
A0A0J9WJQ4	O60841	Q6L4R8	A9TK03		TGME49_214270-t26_1-p1
A0A0J9WJR2				P40531
A0A0J9WJR9	P23786
A0A0J9WKG4	O75874	Q7F280	A9TJK1	P21954	TGME49_266760-t26_1-p1
A0A0J9WKQ6	H3BQK0	P35683	A9TZ99	P10081	TGME49_250770-t26_1-p1
A0A0J9WKW6			A9TMN1
A0A0J9WLE4			A9TBE2
A0A0J9WLN6	Q9H2P9			P32469	TGME49_249920-t26_1-p1
A0A0J9WMF7	Q9UHD8			P25342
A0A0J9WMI0	P00966	Q2QVC1	A9TX31
A0A0J9WML6	P23921	Q5VRF5			TGME49_294640-t26_1-p1
A0A0J9WN66					TGME49_228290-t26_1-p1
A0A0J9WNA0			A9SM84
A0A0J9WND3	P62942	Q6K8D4	A9SRQ1	P20081	TGME49_283850-t26_1-p1
A0A0J9WQ41	B0QY89	Q0DJU1	A9TY01		TGME49_273460-t26_1-p1
A0A0J9WQG8		Q6H798	A9U083	P52910	TGME49_266640-t26_1-p1
A0A0J9WR07	J3KTA4	Q75HJ0	A9T4J8	P20447	TGME49_236650-t26_1-p1
A0A0J9WR11	P31689	Q6F3B0	A9T6M4		TGME49_311240-t26_1-p1
A0A0J9WRY2				P38998
J9MJK9	P37837	Q84ZL6	A9TQS8	P15019	TGME49_229360-t26_1-p1
