# Supplementary material for: Proteome-Wide Analysis of Lysine 2-Hydroxyisobutyrylated Proteins in Fusarium oxysporum
Source: Front Microbiol. 2021 Feb 10;12:623735. doi: 10.3389/fmicb.2021.623735 (PMC7902869; doi:10.3389/fmicb.2021.623735)
Supplement: Supplementary Table 5 — The distribution of proteins of Fusarium oxysporum in GO terms. [file Table_5.XLSX]

## Sheet: Table S5
Table S5. The distribution of proteins in GO terms.
GO Terms Level 1	GO Terms Level 2	No. of Protein
Biological Process	cellular metabolic process	757
	organic substance metabolic process	737
	primary metabolic process	706
	nitrogen compound metabolic process	678
	biosynthetic process	415
	cellular component organization	367
	cellular component biogenesis	318
	regulation of biological process	303
	establishment of localization	241
	cellular localization	226
	cellular response to stimulus	207
	macromolecule localization	194
	catabolic process	178
	response to stress	151
	other	397
Cellular Component	intracellular	954
	intracellular organelle	839
	membrane-bounded organelle	712
	non-membrane-bounded organelle	381
	organelle lumen	287
	ribonucleoprotein complex	267
	catalytic complex	152
	endomembrane system	151
	organelle membrane	147
	envelope	125
	cell periphery	123
	intrinsic component of membrane	112
	other	336
Molecular Function	organic cyclic compound binding	340
	heterocyclic compound binding	336
	protein binding	186
	ion binding	171
	hydrolase activity	170
	transferase activity	146
	small molecule binding	119
	carbohydrate derivative binding	98
	oxidoreductase activity	95
	structural constituent of ribosome	94
	drug binding	76
	macromolecular complex binding	46
	other	318
